# Supplementary material
Source: publisher figshare collection journal article supplement (https://acs.figshare.com/ndownloader/files/10250454)
Supplement: Supplementary file 1 [file 10250454]

# Protein-Substrate Adhesion in Microcontact Printing

## Regulates Cell Behaviors

Shuhuan Hu<sup>a\*</sup>, Ting-Hsuan Chen<sup>ab</sup>, Yanhua Zhao<sup>a</sup>, Zuankai Wang<sup>ab</sup> and Raymond H.W. Lam<sup>ab\*</sup>

<sup>a</sup> Department of Mechanical and Biomedical Engineering, City University of Hong Kong, Hong Kong;

<sup>b</sup> City University of Hong Kong Shenzhen Research Institute, Shenzhen, China;

\* Correspondence should be addressed to S Hu (email: shuhuanhu2-c@my.cityu.edu.hk; Tel: +852-3442-7174) or RHW Lam (email: rhwlam@cityu.edu.hk; Tel: +852-3442-8577; Fax: +852-3442-0172).

### Supplemental Figures

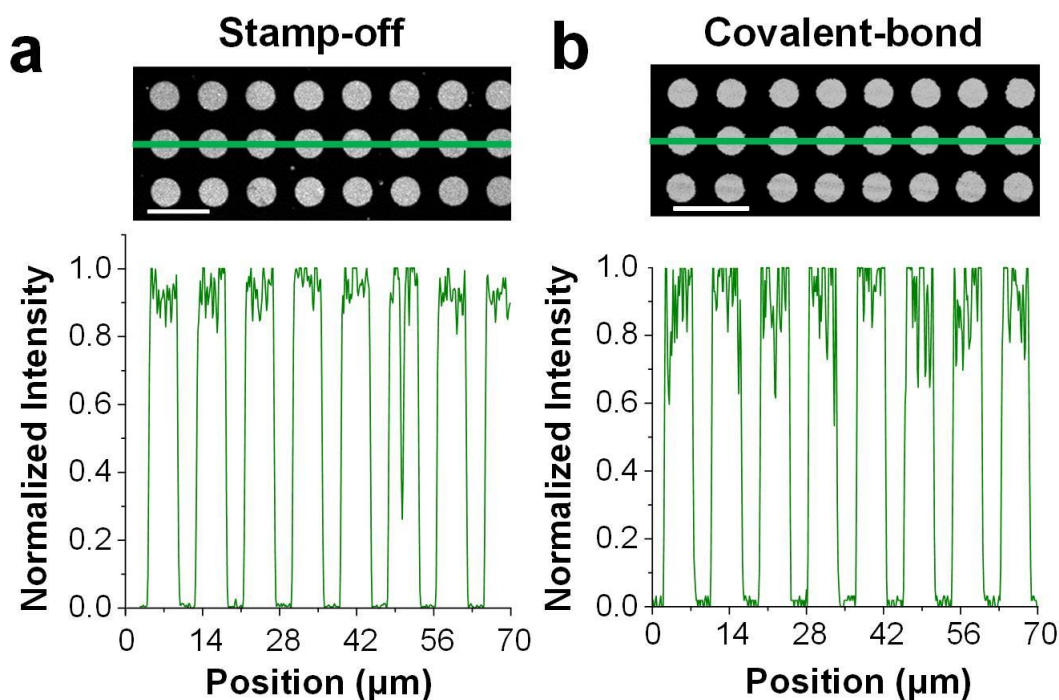

**Figure S1.** Quality of the  $\mu$ CP created patterns. High contrasts of the fluorescent brightness among the patterned areas and uncoated areas indicate the good quality of the created patterns for (a) stamp-off and (b) covalent-bond methods. Scale bar: 10  $\mu\text{m}$ .

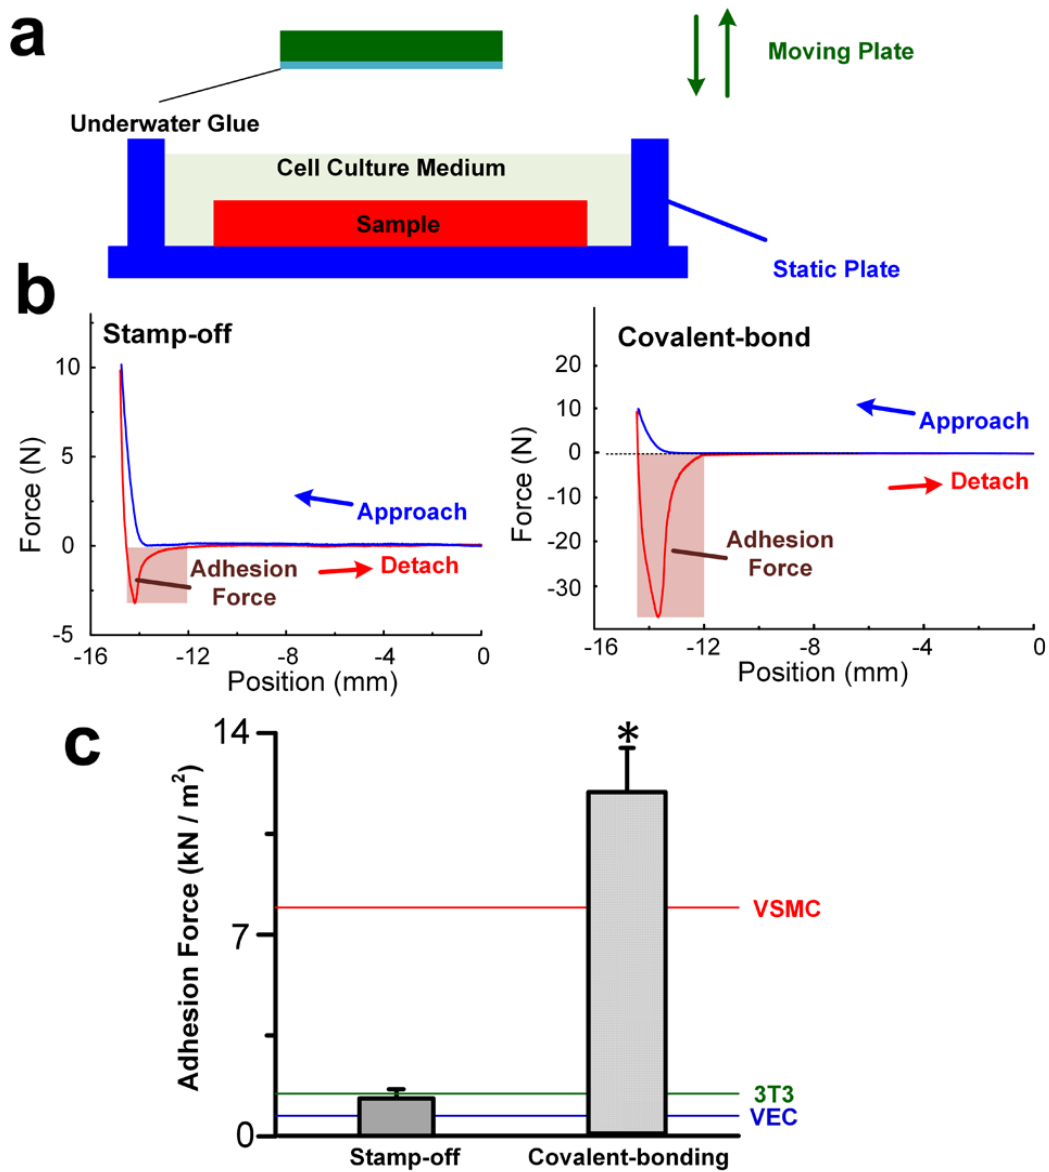

**Figure S2.** Measurement of the adhesion force between the ECM protein and the substrates. **(a)** Set-up of the measurement. **(b)** Representative force-displacement curves for the measurements of the substrates coated by the stamp-off method and the covalent-bond method. **(c)** The adhesion force of protein coating by the stamp-off method and the covalent-bond method.

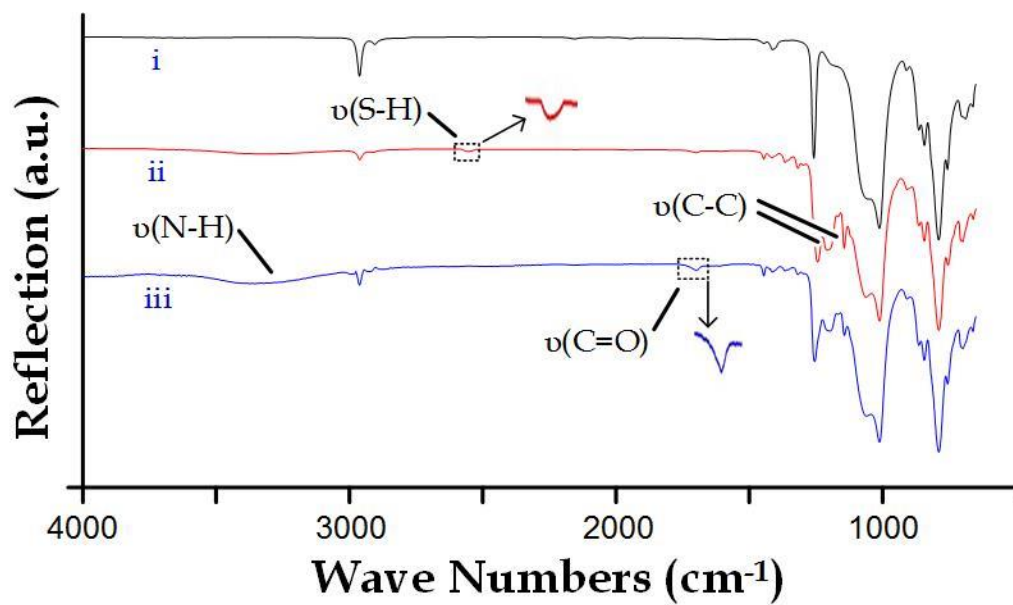

**Figure S3.** ATR-FTIR spectra at the key micropatterning steps.  $\nu(\text{S-H})$  and  $\nu(\text{C-C})$  adsorptions indicate the conjugation of MTPMS;  $\nu(\text{N-H})$  and  $\nu(\text{C=O})$  adsorption indicates the conjugation of GMBS.

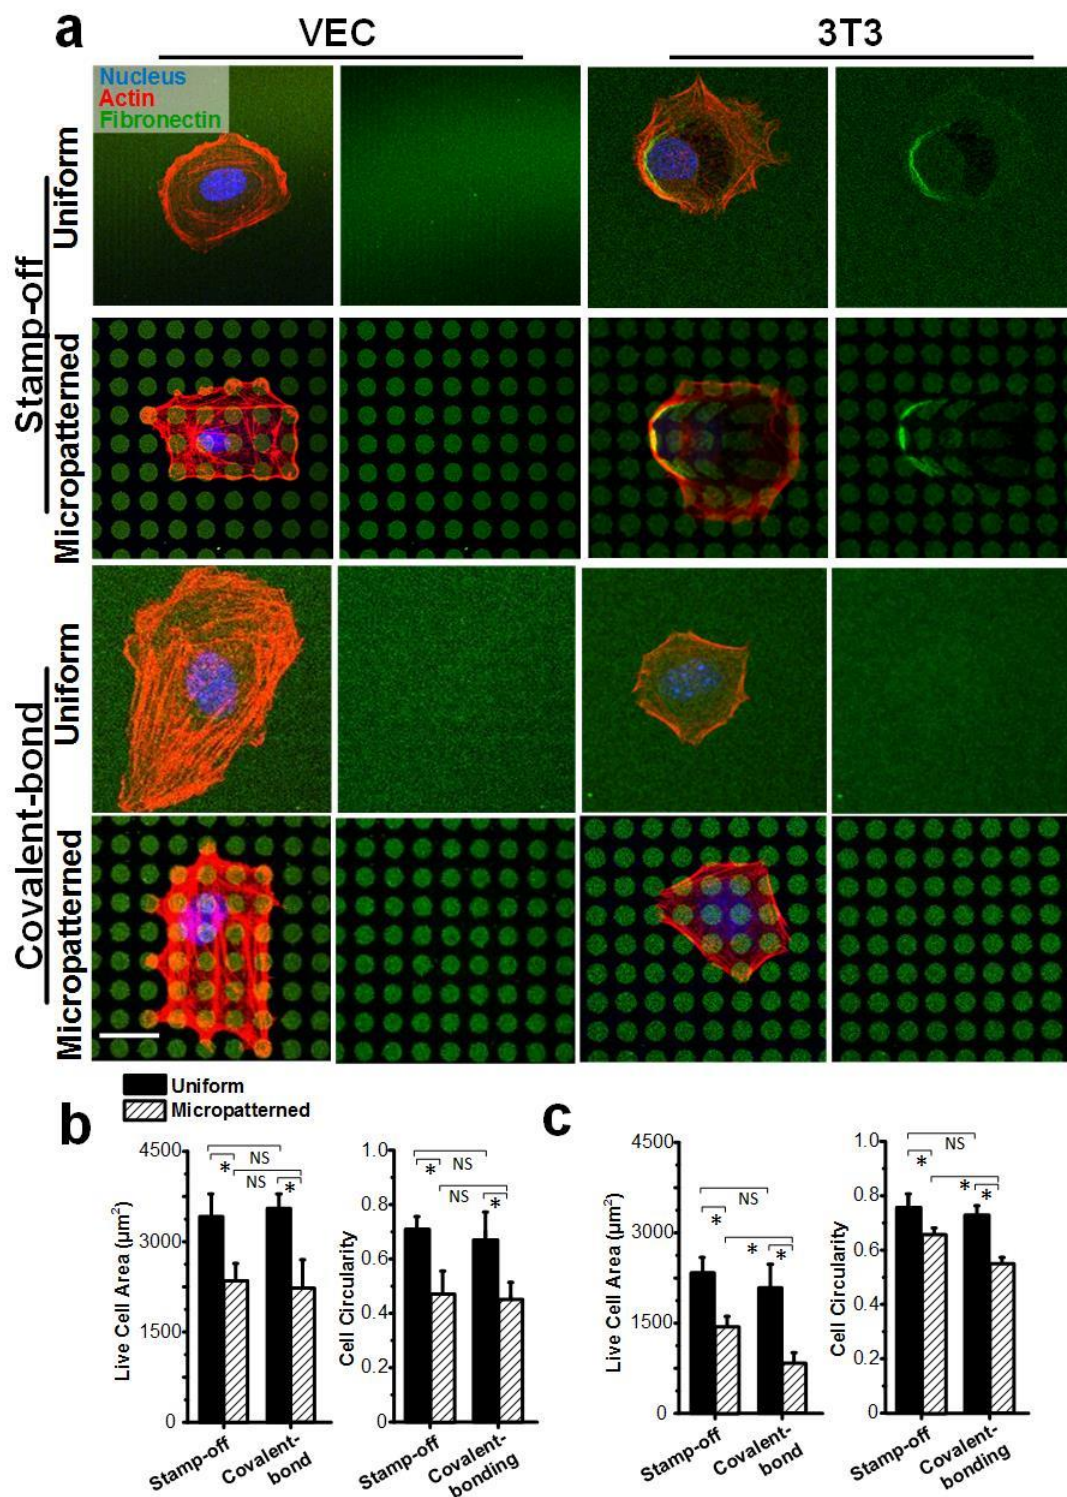

**Figure S4.** Micrographs (a) and morphological statistics of (b) VECs and (c) 3T3 cells seeded on the substrates coated by the stamp-off method and the covalent-bond method. NS stands for no significance. Scale bar: 20  $\mu\text{m}$ .

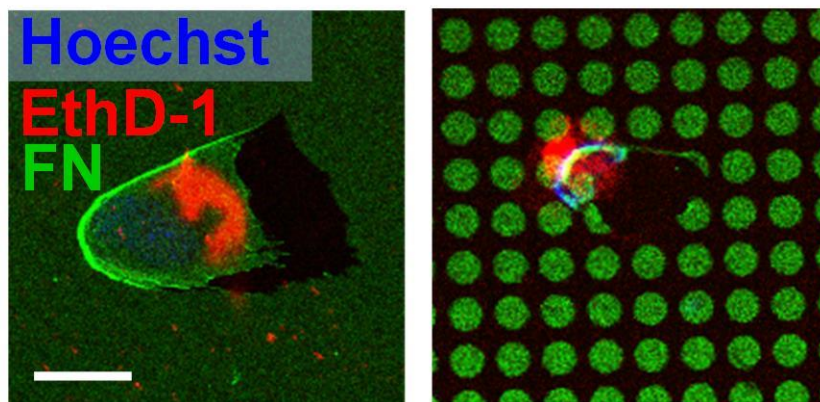

**Figure S5.** Correlations between the ECM protein delamination of the cell death for 3T3 cells. The red colour indicates the EthD-1 dye entered a dead cell. Scale bar: 20  $\mu\text{m}$ .

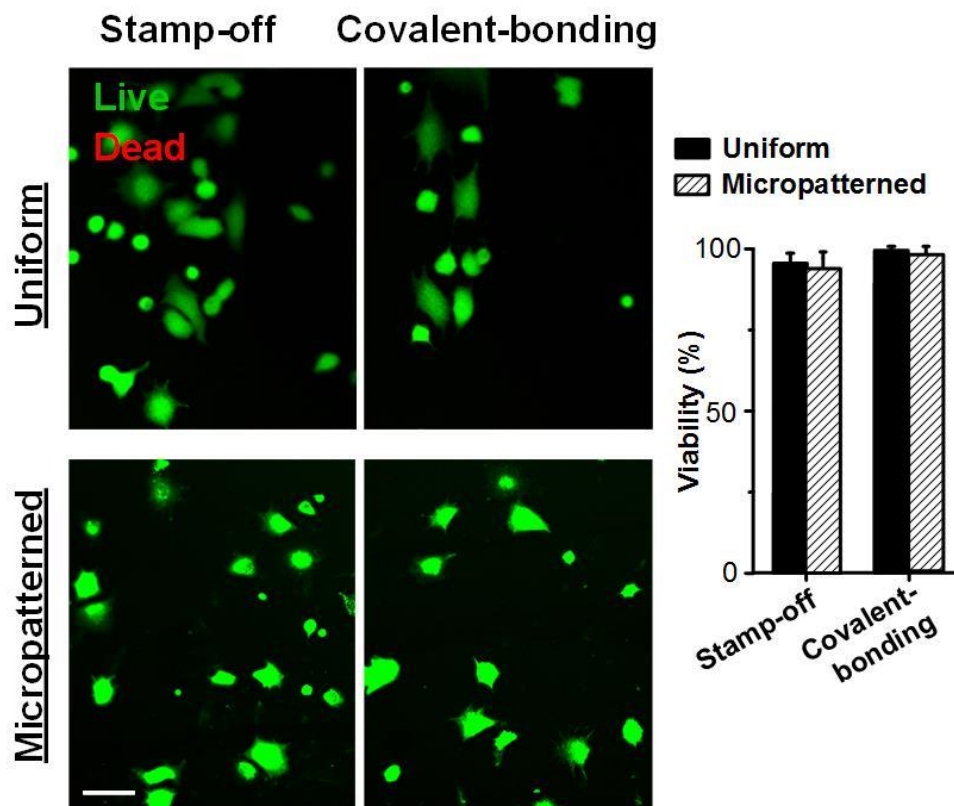

**Figure S6.** VMSCs viability was significantly improved (>90%) after treated with 50  $\mu$ M blebbistatin on the stamp-off and covalent-bonding surfaces. Scale bar: 50  $\mu$ m.
